# Supplementary material for: Oestrogen ameliorates blood-brain barrier damage after experimental subarachnoid haemorrhage via the SHH pathway in male rats
Source: HighWire-hosted journal article supplement (doi:10.1136/svn-2022-001907), 2022-12-16
Supplement: svn-2022-001907supp002_data_supplement.pdf [file svn-2022-001907supp002_data_supplement.pdf]

**Supplemental Table 1: Item list**

| Items                                                    | Company         | Item No.  |
|----------------------------------------------------------|-----------------|-----------|
| <b>Primary Antibodies</b>                                |                 |           |
| Anti-Shh Antibody                                        | Santa Cruz      | sc-365112 |
| Anti-PTCH Polyclonal Antibody                            | Thermofisher    | PA1-46222 |
| Anti-Smoothened antibody                                 | Abcam           | ab236465  |
| Anti-Gli1                                                | Abcam           | ab273018  |
| Anti-Occludin Antibody                                   | Abcam           | ab216327  |
| Anti-Claudin3 Antibody                                   | Thermofisher    | PA5-16867 |
| Anti-Claudin5 Antibody                                   | Thermofisher    | 35-2500   |
| Anti-NeuN antibody                                       | Abcam           | ab177487  |
| Anti-GFAP Antibody                                       | Abcam           | ab7260    |
| Anti- $\beta$ -Actin Antibody                            | Santa Cruz      | sc-47778  |
| Anti-GAPDH Antibody                                      | Affinity        | AF7021    |
| GSL Isolectin-B4                                         | Thermofisher    | L32473    |
| <b>Secondary Antibodies</b>                              |                 |           |
| Anti-rabbit IgG, HRP-linked Antibody #7074               | CST             | 7074s     |
| Anti-mouse IgG, HRP-linked Antibody #7076                | CST             | 7076s     |
| Donkey Anti-Mouse IgG H&L (Alexa Fluor® 488)             | Abcam           | ab150105  |
| Donkey Anti-Rabbit IgG H&L (Alexa Fluor® 568)            | Abcam           | ab175470  |
| <b>ELISA kits</b>                                        |                 |           |
| Human Sonic Hedgehog/Shh N-Terminus Quantikine ELISA Kit | Rnd systems     | DSHH00    |
| Human Estrogen ELISA Kit                                 | Finetest        | EH4184    |
| Rat Albumin ELISA kit                                    | Abcam           | ab108789  |
| <b>Intervention drugs</b>                                |                 |           |
| Cyclopamine                                              | Shanghai YUANYE | B20547    |

---

|             |                 |        |
|-------------|-----------------|--------|
| Fulvestrant | Shanghai YUANYE | S41859 |
| Estrogen    | Shanghai YUANYE | S30633 |
| Corn oil    | Shanghai YUANYE | S50856 |

---

|                                                    |                                                    |             |
|----------------------------------------------------|----------------------------------------------------|-------------|
| Cell culture                                       |                                                    |             |
| DMEM high glucose (no phenol red, sodium pyruvate) | Procell                                            | PM150225    |
| Penicillin/streptomycin solution                   | Shanghai Zhong Qiao Xin Zhou Biotechnology Co.,Ltd | 503         |
| Fetal bovine serum                                 | Shanghai Zhong Qiao Xin Zhou Biotechnology Co.,Ltd | 25          |
| Trypsin/EDTA digestion solution                    | Gibco                                              | 25200056    |
| Hemoglobin, freeze dried                           | MP Biomedical                                      | 02151234-CF |
| HrSHH                                              | Abcam                                              | ab268966    |

---
