# Supplementary material for: Oestrogen ameliorates blood-brain barrier damage after experimental subarachnoid haemorrhage via the SHH pathway in male rats
Source: HighWire-hosted journal article supplement (doi:10.1136/svn-2022-001907), 2022-12-16
Supplement: svn-2022-001907supp003_data_supplement.pdf [file svn-2022-001907supp003_data_supplement.pdf]

**Supplemental Table 2: Shh protein and estrogen levels in CSF**

| Sample Number | Age | Sex    | shh protein level (pg/ml) | estrogen level (pg/ml) |
|---------------|-----|--------|---------------------------|------------------------|
| 1             | 63  | Female | 78.552                    | 80.4562                |
| 2             | 48  | Male   | 329.54118                 | 118.4834               |
| 3             | 51  | Female | 422.62326                 | 128.2442               |
| 4             | 38  | Female | 312.91938                 | 176.2774               |
| 5             | 57  | Female | 124.26195                 | 62.7896                |
| 6             | 69  | Male   | 247.26327                 | 74.6908                |
| 7             | 46  | Male   | 81.04527                  | 87.9594                |
| 8             | 45  | Male   | 87.69399                  | 87.5602                |
| 9             | 41  | Female | 204.87768                 | 85.8528                |
| 10            | 62  | Female | 83.53854                  | 21.3406                |
| 11            | 65  | Male   | 129.24849                 | 64.5362                |
| 12            | 63  | Female | 64.42347                  | 71.4128                |
| 13            | 58  | Female | 99.32925                  | 103.4108               |
| 14            | 61  | Male   | 36.16641                  | 87.031                 |
| 15            | 79  | Male   | 232.30365                 | 57.3756                |
| 16            | 63  | Male   | 176.62062                 | 73.0868                |
| 17            | 47  | Female | 356.96715                 | 146.2598               |
| 18            | 43  | Female | 259.72962                 | 158.6058               |
| 19            | 58  | Male   | 61.9302                   | 84.628                 |
| 20            | 49  | Male   | 125.92413                 | 57.2488                |
